# Supplementary material for: Increased circulating microRNA-122 is a biomarker for discrimination and risk stratification in patients defined by sepsis-3 criteria
Source: PubMed Central journal article supplement (PMC5962092; doi:10.1371/journal.pone.0197637), 2018-05-21

**S1 Fig: Cycle Threshold [CT] of cel-miR-54 expression in control patients, sepsis survivors, and sepsis non-survivors.** Cel-miR-54 levels are presented in scatter plots. Data are shown as median with interquartile range.

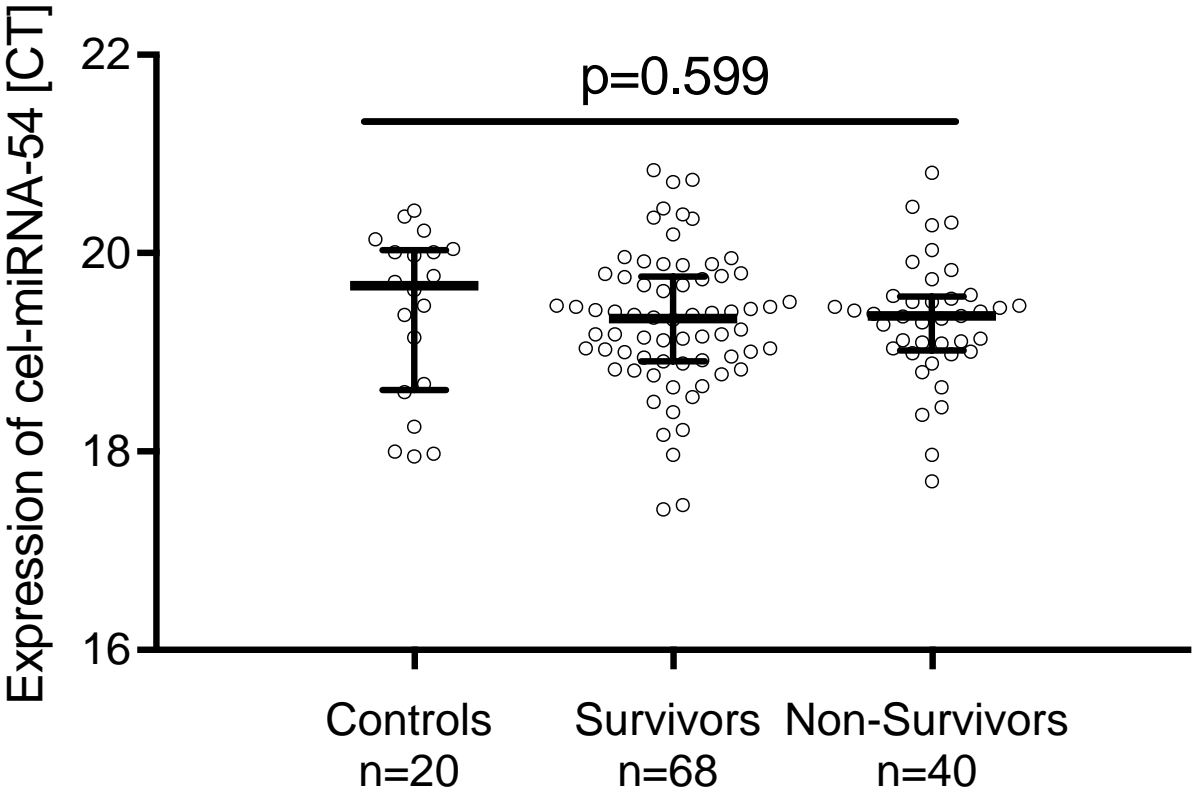

Supplement: pone.0197637.s001.pdf [file pone.0197637.s001.pdf]
